# Supplementary material for: Molecular evolution of Keap1 was essential for adaptation of vertebrates to terrestrial life
Source: PubMed Central journal article supplement — Sci Adv. 2023 May 19;9(20):eadg2379. doi: 10.1126/sciadv.adg2379 (PMC10198636; doi:10.1126/sciadv.adg2379), 2023-05-19
Supplement: sciadv.adg2379_sm.pdf [file sciadv.adg2379_sm.pdf]

Supplementary Materials for  
**Molecular evolution of Keap1 was essential for adaptation of vertebrates to  
terrestrial life**

Kanae Yumimoto *et al.*

Corresponding author: Keiichi I. Nakayama, nakayak1@bioreg.kyushu-u.ac.jp

*Sci. Adv.* **9**, eadg2379 (2023)  
DOI: 10.1126/sciadv.adg2379

**This PDF file includes:**

Figs. S1 to S8  
Tables S1 to S3

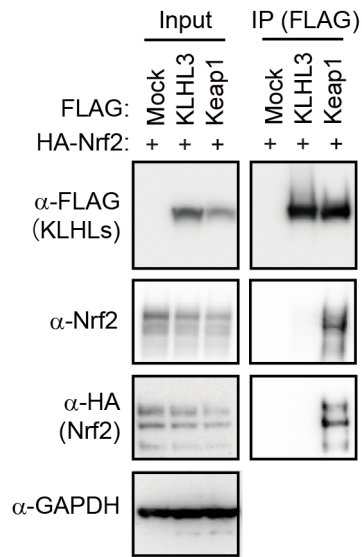

**Fig. S1. Overexpressed Keap1 interacts with Nrf2.** Lysates of HEK293T cells expressing FLAG-tagged human KLHL3 or Keap1 together with HA-tagged human Nrf2 were subjected to immunoprecipitation with antibodies to FLAG, and the resulting precipitates as well as the original lysates were subjected to immunoblot analysis with the indicated antibodies.

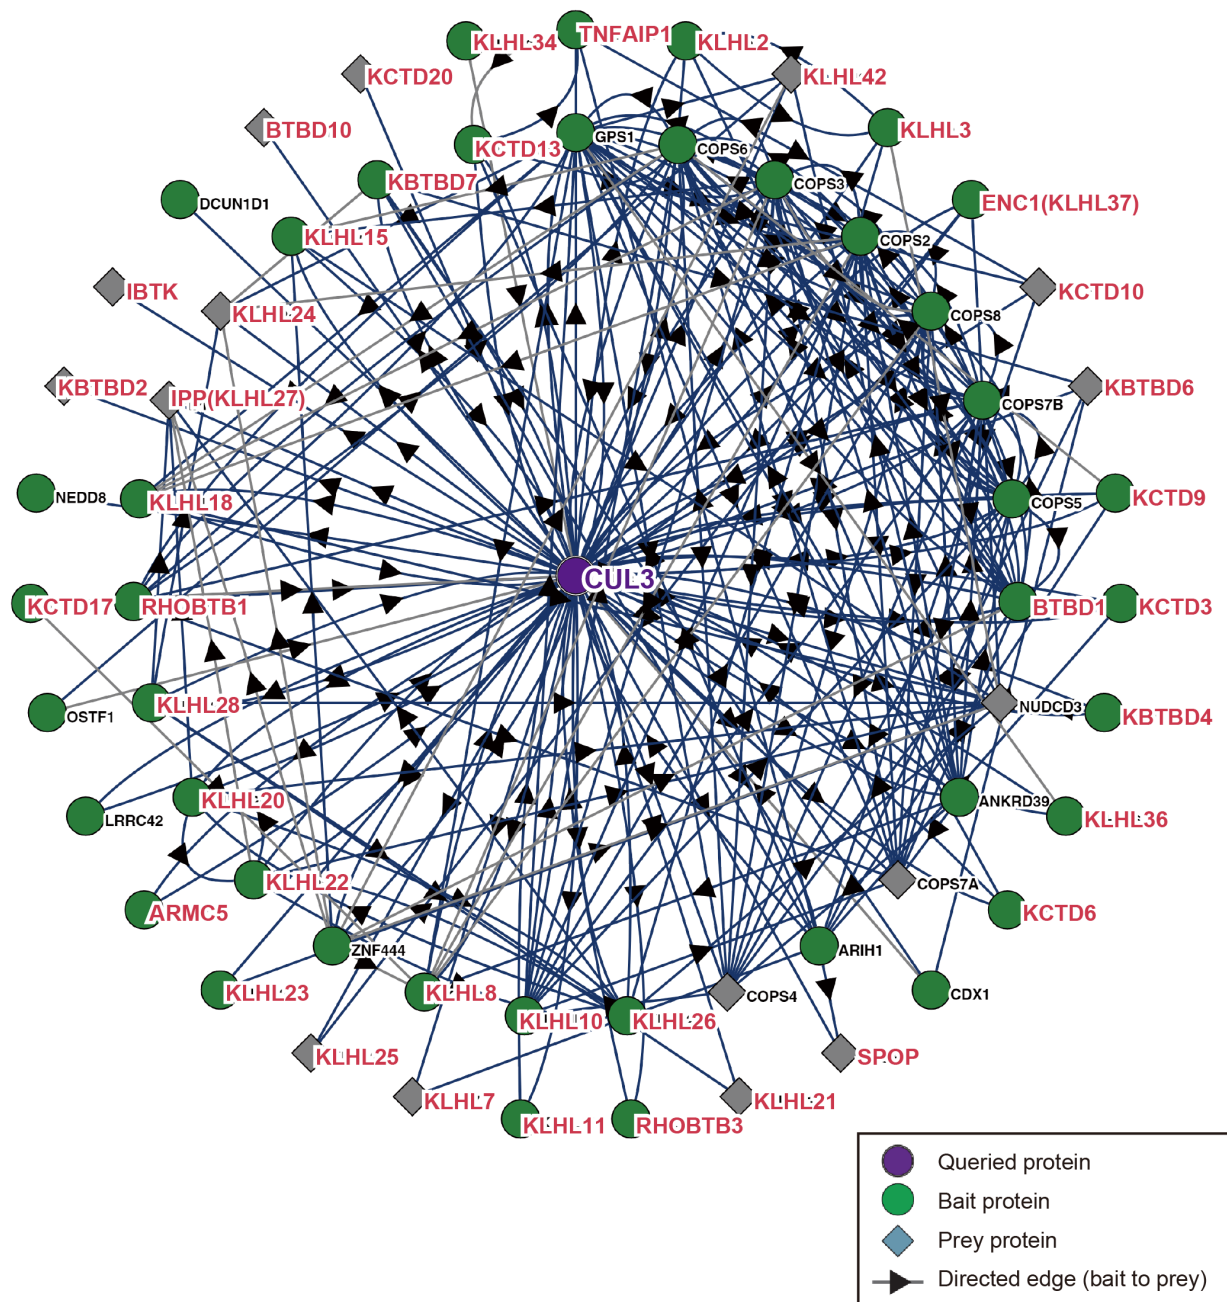

**Fig. S2. Cul3 binding proteins listed in the BioPlex 3.0 interactome database.** Binding proteins of Cul3 in HEK293T or HCT116 cells were identified from the BioPlex 3.0 database (<https://bioplex.hms.harvard.edu>). The names of proteins with BTB domains are shown in red letters, whereas binding detected in HEK293T or HCT116 cells is indicated by blue and gray lines, respectively.

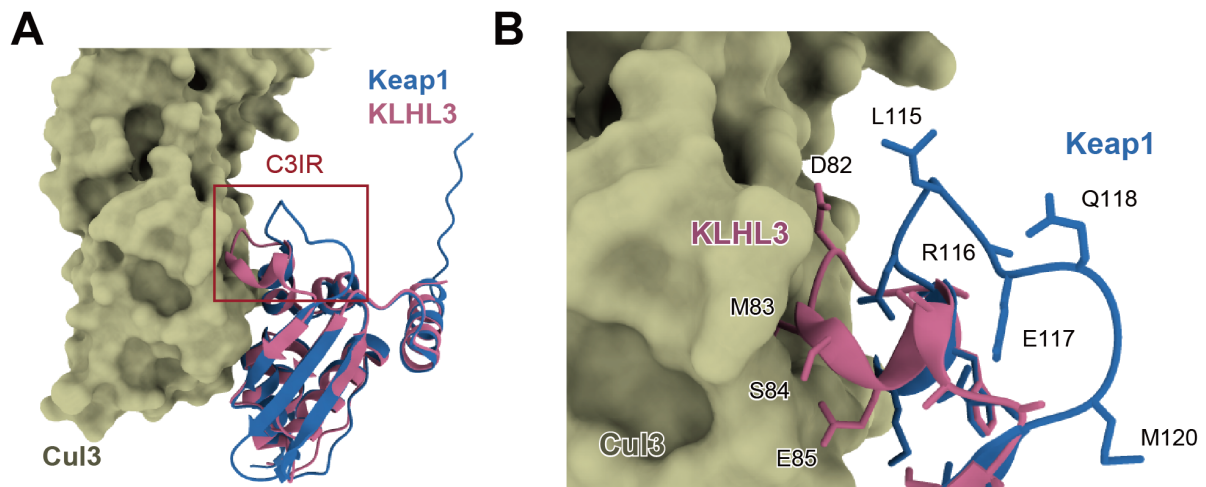

**Fig. S3 Structural alignment of the human Cul3-KLHL3 complex (PDB: 4HXI) with the BTB domain of human Keap1 (4CXI).** The boxed region containing C3IR of Keap1 in (A) is shown enlarged in (B).

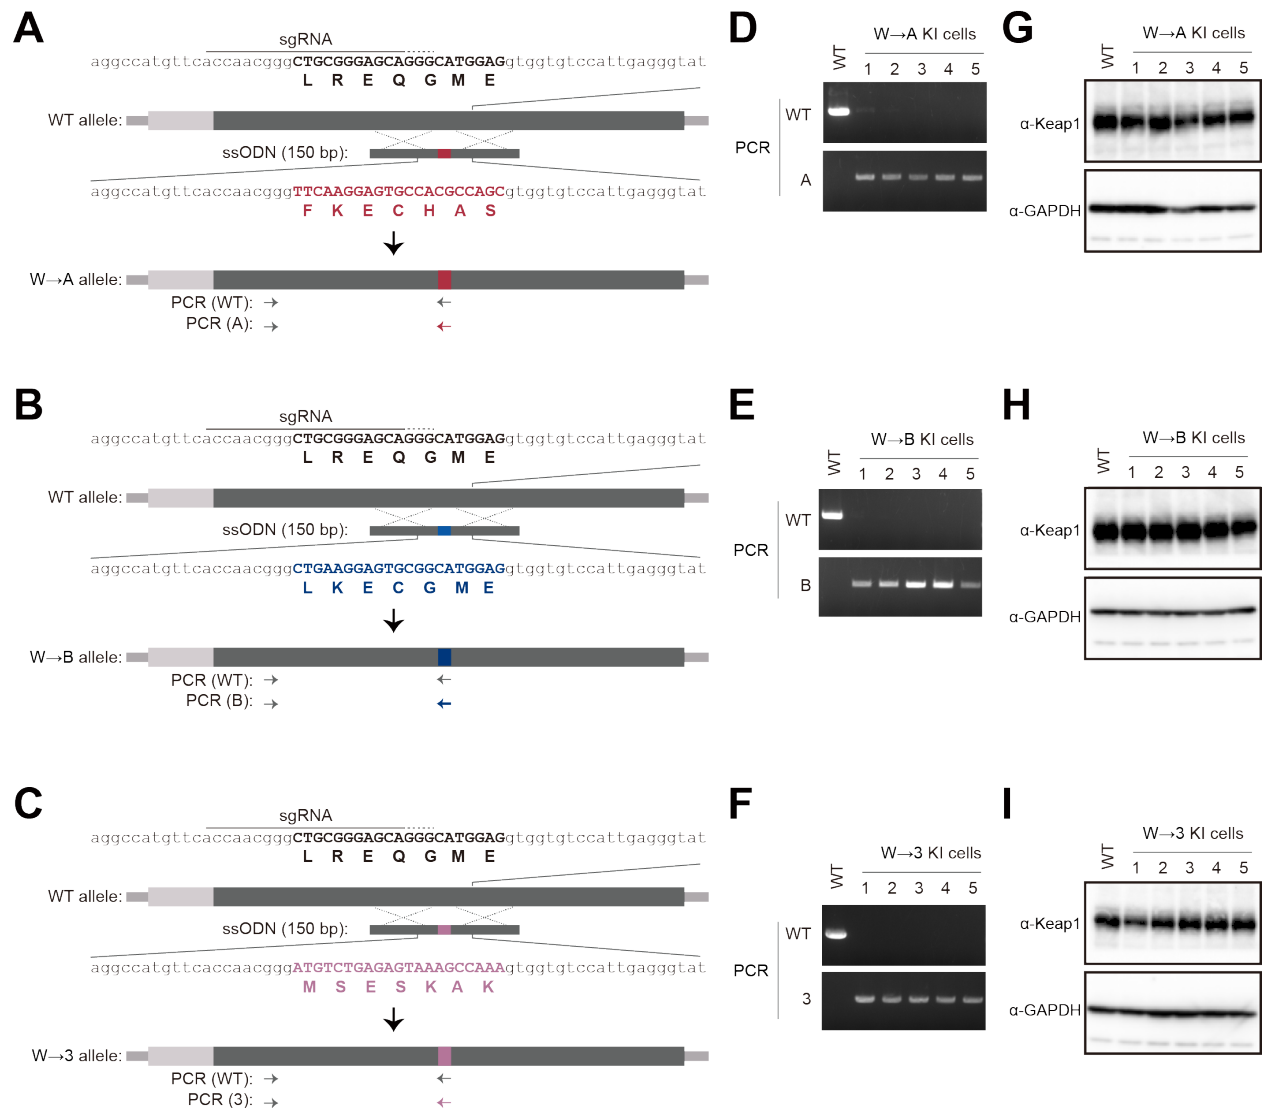

**Fig. S4. Construction of C3IR knock-in HEK293T cells.** (A to C) Schematic representation of exon 2 of the WT human Keap1 allele, the single-stranded oligodeoxynucleotide (ssODN) for knock-in of the W→A (A) W→B (B), or W→3 (C) mutation, and the mutant allele after homologous recombination. The single guide RNA (sgRNA) for the CRISPR-Cas9 system and its protospacer adjacent motif (PAM) are indicated by continuous and dotted overlines, respectively. The 5' untranslated region and open reading frame of the Keap1 gene are represented by the light and dark gray boxes, respectively. Each mutation is shown in red, blue, or pink. (D to F) PCR analysis of genomic DNA for WT (D to F) or five clones of W→A (D), W→B (E), or W→3 (F) knock-in (KI) HEK293T cells. PCR primers are indicated in (A) to (C), respectively. (G to I) Protein extracts of WT (G to I) or W→A (G), W→B (H), or W→3 (I) knock-in HEK293T cells were subjected to immunoblot analysis with the indicated antibodies.

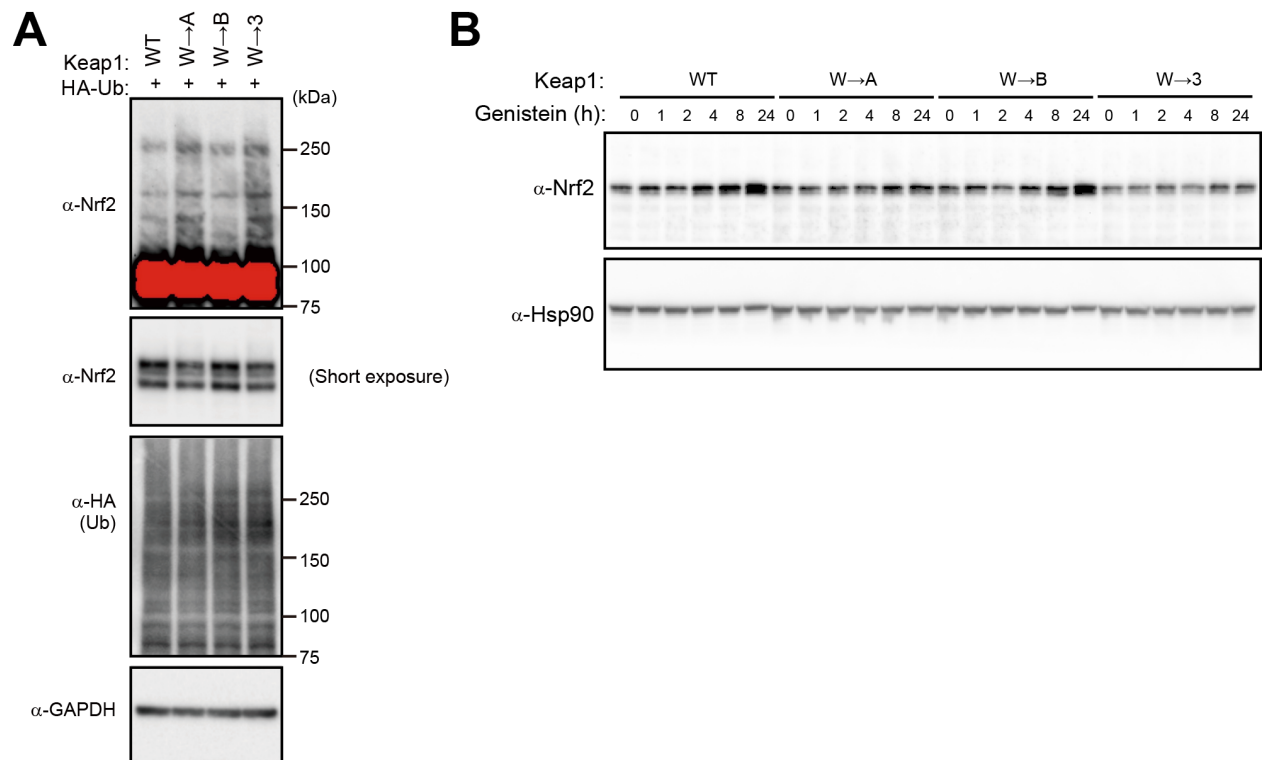

**Fig. S5. Nrf2 ubiquitylation is increased and Nrf2 accumulation in response to oxidative stress is attenuated in Keap1(W→A) or Keap1(W→3) knock-in cells. (A)** WT or Keap1 C3IR mutation knock-in HEK293T cells expressing HA-tagged ubiquitin (Ub) were treated with 1  $\mu$ M MLN4924 for 24 h, lysed, and subjected to immunoblot analysis with the indicated antibodies. **(B)** WT or Keap1 C3IR mutation knock-in HEK293T cells were exposed to 100  $\mu$ M genistein (B) for the indicated times, lysed, and subjected to immunoblot analysis with antibodies to Nrf2.

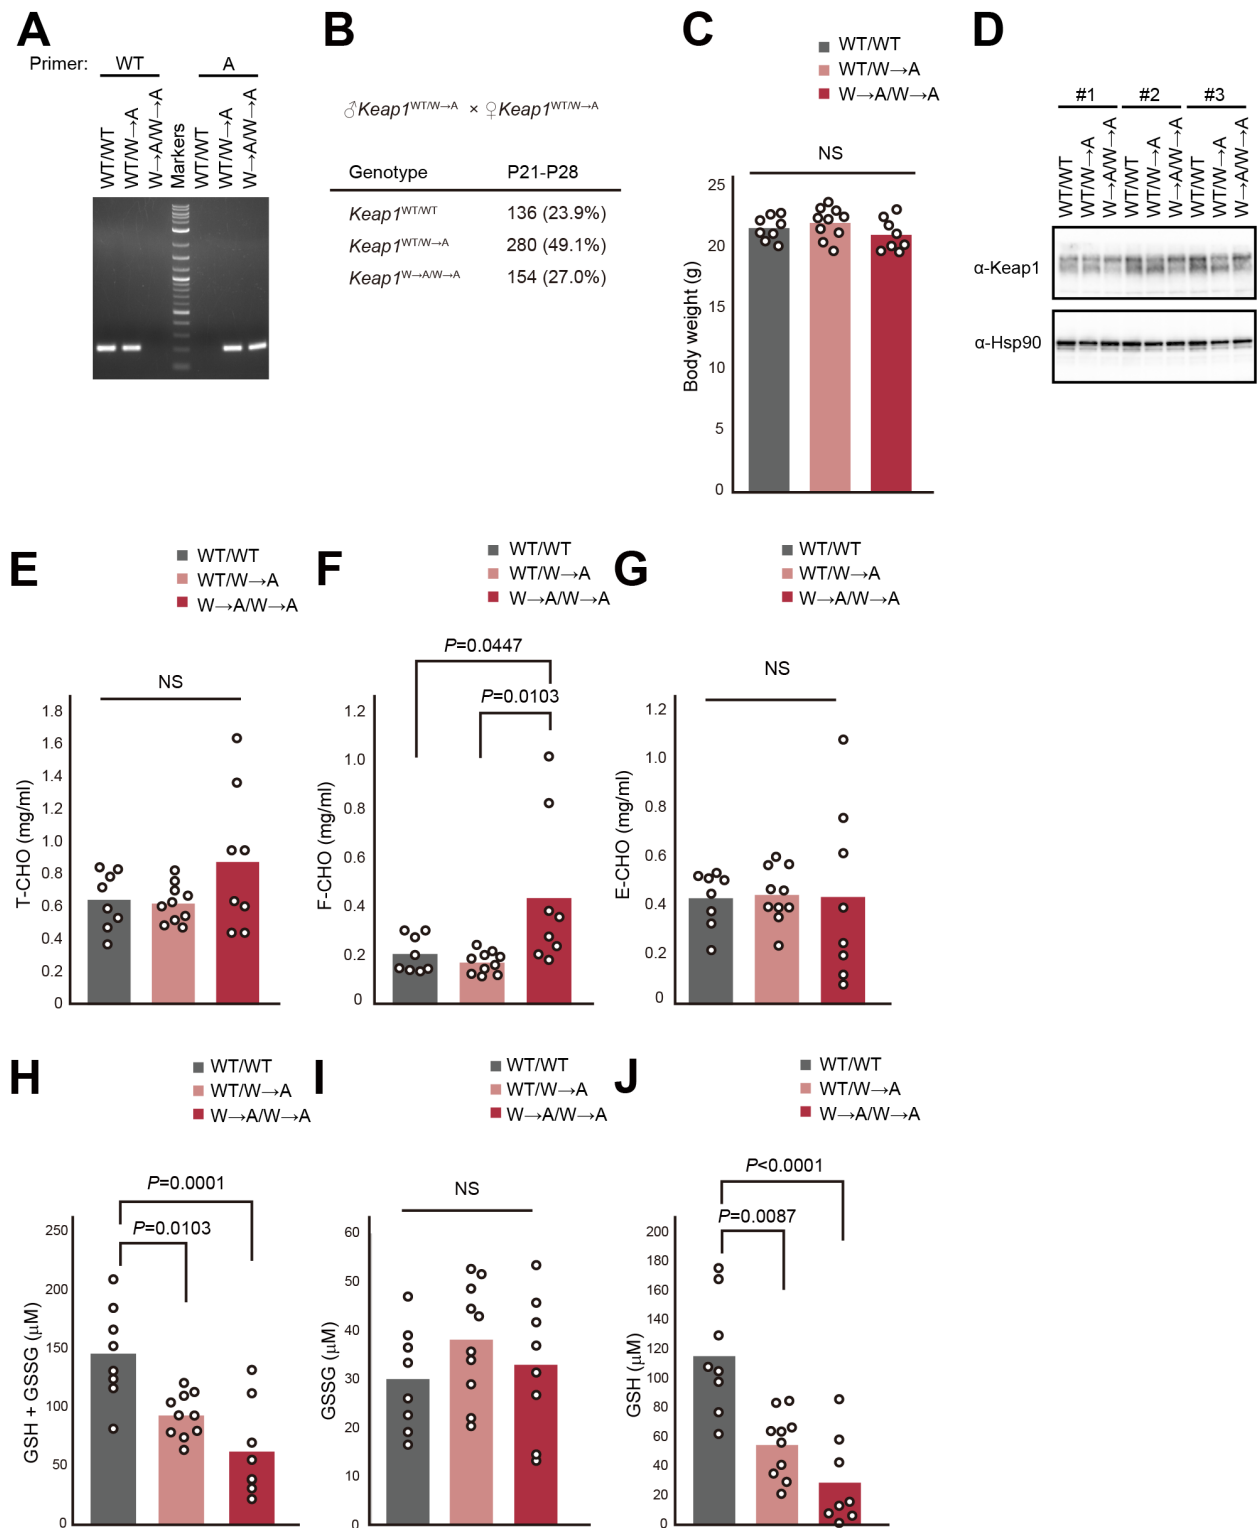

**Fig. S6. *Keap1*<sup>W->A/W->A</sup> knock-in mice show a severe phenotype for APAP-induced liver injury.** (A) PCR analysis of genomic DNA from the tail of mice of the indicated genotypes. PCR primers are indicated in Figure 5A. (B) Genotype frequencies for live offspring at postnatal day (P) 21 to P28 produced from *Keap1*<sup>WT/W->A</sup> mouse intercrosses. (C) Body weight of male WT, *Keap1*<sup>WT/W->A</sup>, or *Keap1*<sup>W->A/W->A</sup> mice at 8 weeks of age. Data are means for 8 to 10 mice of

each genotype. NS, not significant (one-way ANOVA followed by the Tukey-Kramer post hoc test). **(D)** Protein extracts of the liver of WT, *Keap1*<sup>WT/W→A</sup>, or *Keap1*<sup>W→A/W→A</sup> mice at 8 weeks of age were subjected to immunoblot analysis with the indicated antibodies. Three animals were examined for each genotype. **(E to G)** Serum concentrations of total cholesterol (T-CHO) (E), free cholesterol (F-CHO) (F), and esterified cholesterol (E-CHO) (G) for WT, *Keap1*<sup>WT/W→A</sup>, or *Keap1*<sup>W→A/W→A</sup> mice at 8 weeks of age. Data are means for 8 to 10 mice of each genotype. Statistical analysis was performed by one-way ANOVA followed by the Tukey-Kramer post hoc test. **(H to J)** Concentrations of total glutathione (GSH + GSSG) (H), oxidized glutathione (GSSG) (I), and reduced glutathione (GSH) (J) in liver extracts of WT, *Keap1*<sup>WT/W→A</sup>, or *Keap1*<sup>W→A/W→A</sup> mice at 8 weeks of age. Data are means for 8 to 10 mice of each genotype. Statistical analysis was performed by one-way ANOVA followed by the Tukey-Kramer post hoc test.



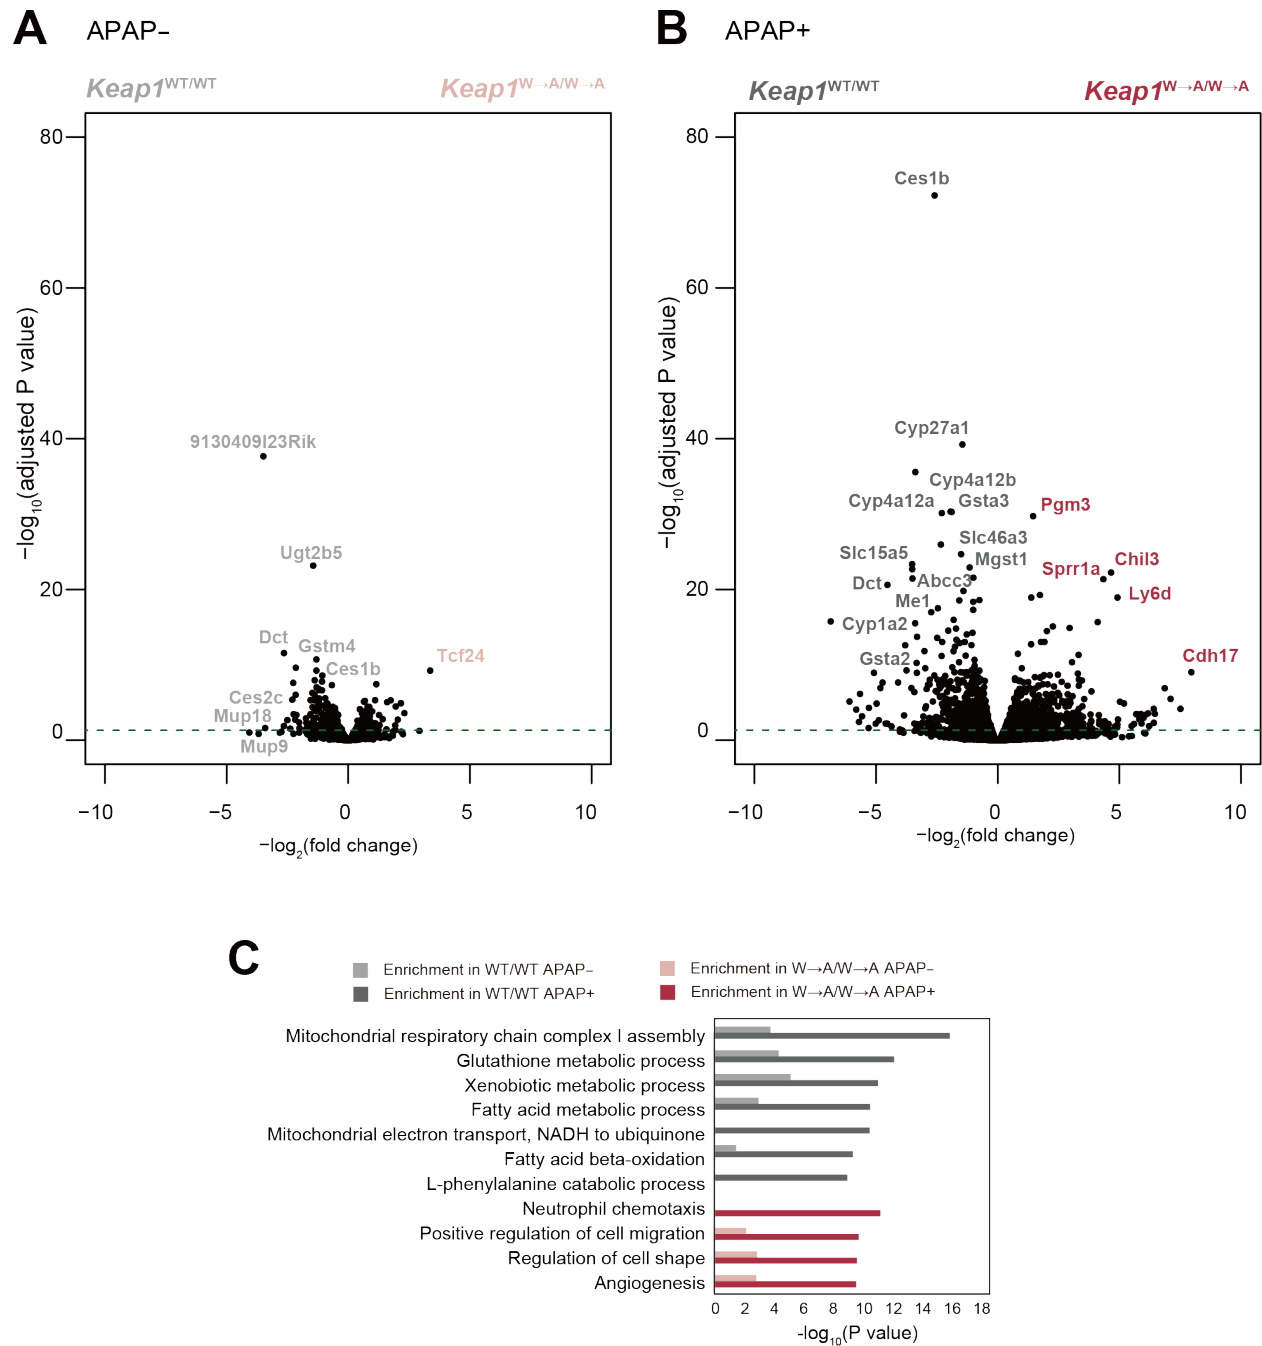

**Fig. S7. RNA-seq analysis for the liver of *Keap1*<sup>W→A/W→A</sup> and WT mice with or without administration of an overdose of APAP. (A and B) Volcano plots for RNA-seq data obtained from the liver of WT or *Keap1*<sup>W→A/W→A</sup> mice that were either left untreated (A) or treated with APAP (B) as in Figure 5D. (C) GO analysis of differentially expressed genes identified from RNA-seq analysis as in (A) and (B).**

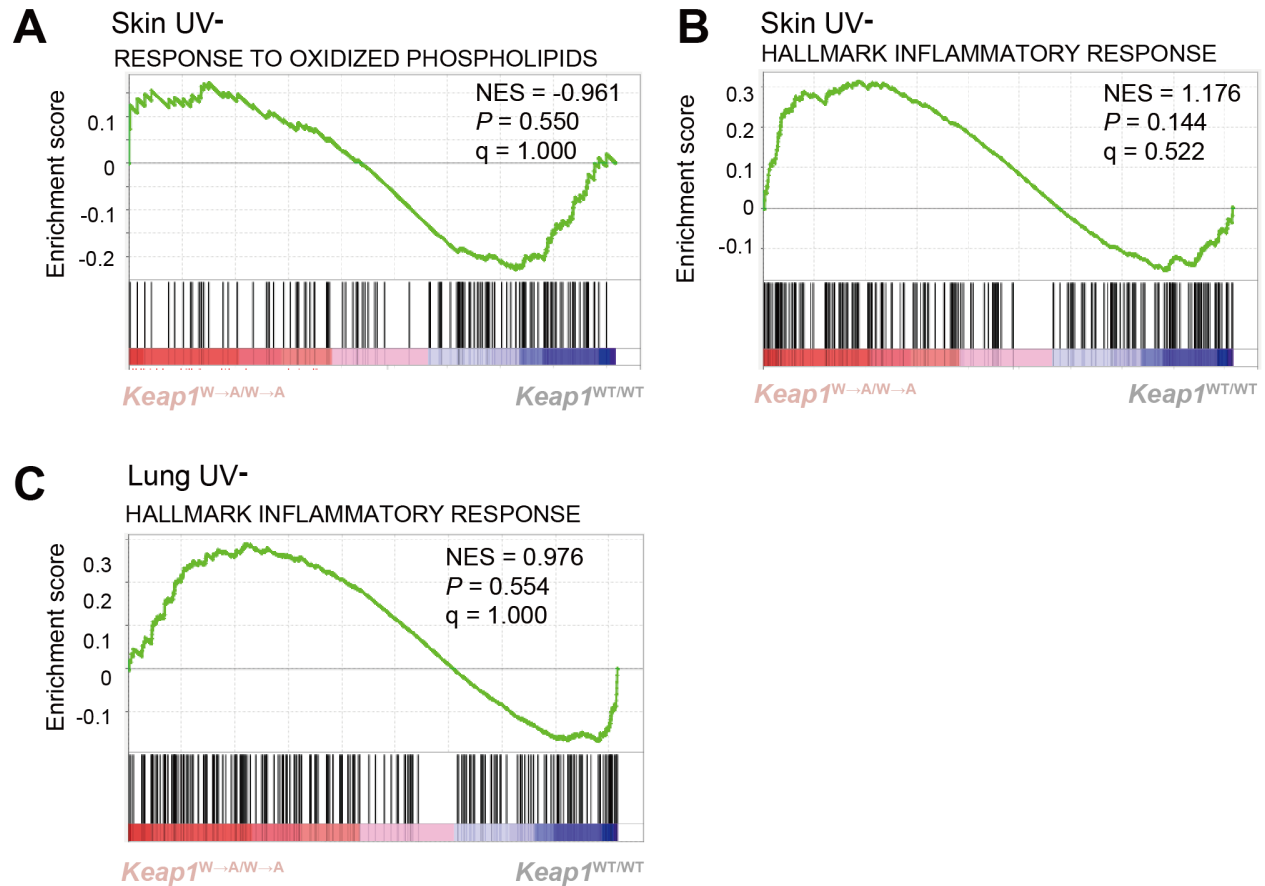

**Fig. S8. GSEA plots constructed from RNA-seq data for nonirradiated *Keap1*<sup>W→A/W→A</sup> and WT mice at P6.5.** (A and B) GSEA plots for gene sets associated with the response to oxidized phospholipids (A) or the inflammatory response (B) were constructed from RNA-seq data for skin. (C) A GSEA plot for the gene set associated with the inflammatory response was constructed from RNA-seq data for lung.

**Table S1. List of antibodies used in this study**

| <b>ANTIBODIES</b>                                         | <b>SOURCE</b>                    | <b>IDENTIFIER</b> |
|-----------------------------------------------------------|----------------------------------|-------------------|
| FLAG-M2                                                   | Sigma                            | F1804 or F7425    |
| MYC-9E10                                                  | Sigma                            | M5546             |
| HA-HA11                                                   | Covance                          | MMS-101R          |
| Cul3                                                      | BD Transduction<br>Laboratories™ | 611848            |
| Nrf2-H300                                                 | Santa Cruz<br>Biotechnology      | sc-13032          |
| Keap1-D1G10                                               | Cell Signaling<br>Technology     | 7705              |
| GAPDH-1D4                                                 | Enzo Life Sciences               | A-335E            |
| $\alpha$ Tubulin-TU1                                      | Invitrogen™                      | 13-8000           |
| Hsp90                                                     | BD Transduction<br>Laboratories™ | 610419            |
| 4-HNE                                                     | JaICA                            | MHN-100P          |
| Anti-Mouse IgG (H+L), HRP Conjugate                       | Promega                          | W4021             |
| Anti-Rabbit IgG (H+L), HRP Conjugate                      | Promega                          | W4011             |
| Purified Rat Anti-Mouse CD16/CD32<br>(Mouse BD Fc Block™) | BD Pharmingen™                   | 553141            |
| FITC anti-mouse CD45.2 Antibody                           | BioLegend                        | 109806            |
| APC/Cyanine7 anti-mouse/human CD11b<br>Antibody           | BioLegend                        | 101226            |
| PE anti-mouse F4/80 Antibody                              | BioLegend                        | 157304            |
| Brilliant Violet 421 anti-mouse CD11c<br>Antibody         | BioLegend                        | 123110            |
| BV510 Rat Anti-Mouse Siglec-F                             | BD OptiBuild™                    | 740158            |
| APC anti-mouse CD80 Antibody                              | BioLegend                        | 104714            |
| PE/Cyanine7 anti-mouse CD206 (MMR)<br>Antibody            | BioLegend                        | 141720            |

**Table 2 | List of oligonucleotides used in this study**

| <b>Oligonucleotides</b>                                                  |                                                                                                                                                                                  |
|--------------------------------------------------------------------------|----------------------------------------------------------------------------------------------------------------------------------------------------------------------------------|
| Human NQO1 Forward Primer                                                | 5'-CCGCAGACCTTGTGATATTCC-3'                                                                                                                                                      |
| Human NQO1 Reverse Primer                                                | 5'-TCTCCTATGAACACTCGCTCAAAC-3'                                                                                                                                                   |
| Human HO1 Forward Primer                                                 | 5'-GCCAGCAACAAAGTGCAAGAT-3'                                                                                                                                                      |
| Human HO1 Reverse Primer                                                 | 5'-AGTGTAAGGACCCATCGGAGAA-3'                                                                                                                                                     |
| Human RPS18 Forward Primer                                               | 5'-GATCCCTGAAAAGTTCCAGCA-3'                                                                                                                                                      |
| Human RPS18 Reverse Primer                                               | 5'-CATGAGCATATCTTCGGCCC-3'                                                                                                                                                       |
| ssODN for W→A_mutation<br>Knockin in HEK293T                             | 5'-<br>CTGGCCTCATCCAGCCCTGTCTTCAAGGCCATGT<br>TCACCAACGGGTTCAAGGAGTGCCACGCCAGCG<br>TGGTGTCCATTGAGGGTATCCACCCCAAGGTCAT<br>GGAGCGCCTCATTGAATTCGCCTACACGGCCTCC<br>ATCTCCATGGGCGAG-3' |
| ssODN for W→B_mutation<br>Knockin in HEK293T                             | 5'-<br>CTGGCCTCATCCAGCCCTGTCTTCAAGGCCATGT<br>TCACCAACGGGCTGAAGGAGTGCGGCATGGAG<br>GTGGTGTCCATTGAGGGTATCCACCCCAAGGTC<br>ATGGAGCGCCTCATTGAATTCGCCTACACGGCCT<br>CCATCTCCATGGGCGAG-3' |
| ssODN for W→3_mutation<br>Knockin in HEK293T                             | 5'-<br>CTGGCCTCATCCAGCCCTGTCTTCAAGGCCATGT<br>TCACCAACGGGATGTCTGAGAGTAAAGCCAAAG<br>TGGTGTCCATTGAGGGTATCCACCCCAAGGTCAT<br>GGAGCGCCTCATTGAATTCGCCTACACGGCCTCC<br>ATCTCCATGGGCGAG-3' |
| oligonucleotides of the human<br>Keap1 sgRNA target<br>sequences_Foward  | 5'-CACCACCAACGGGCTGCGGGAGCA-3'                                                                                                                                                   |
| oligonucleotides of the human<br>Keap1 sgRNA target<br>sequences_Reverse | 5'-AAACTGCTCCCGCAGCCCGTTGGT-3'                                                                                                                                                   |
| human Keap1(Common)_Forward                                              | 5'-AGGTTGATCAGGTCGGGGAAG-3'                                                                                                                                                      |
| human Keap1(WT)_Reverse                                                  | 5'-CTCCATGCCCTGCTCCCGCAG-3'                                                                                                                                                      |
| human<br>Keap1(W→A_mutant)_Reverse                                       | 5'-CTGGCGTGGCACTCCTTGAAC-3'                                                                                                                                                      |
| human<br>Keap1(W→B_mutant)_Reverse                                       | 5'-GACACCACCTCCATGCCGCAC-3'                                                                                                                                                      |
| human<br>Keap1(W→3_mutant)_Reverse                                       | 5'-GGCTTTACTCTCAGACATC-3'                                                                                                                                                        |

|                                                                          |                                                                                                                                                                                                                                           |
|--------------------------------------------------------------------------|-------------------------------------------------------------------------------------------------------------------------------------------------------------------------------------------------------------------------------------------|
| ssODN for W®A_ mutation<br>Knockin in mice                               | 5'-<br>ATGAGGACATCCCAGCTGCCCAATTCATGGCTCA<br>CAAAGTGGTGGCTGGCCTCCTCCAGCCCAGTCTT<br>TAAAGCCATGTTACCAACGGGTCAAGGAGTG<br>CCACGCCAGCGTGGTGTCCATCGAAGGCATCCA<br>CCCTAAGGTCATGGAAAGGCTTATTGAGTTCGCC<br>TACACGGCCTCCATCTCCGTGGGCGAGAAGTGT-<br>3' |
| oligonucleotides of the mouse<br>Keap1 sgRNA target<br>sequences_Forward | 5'-CACCACCAACGGGCTTCGGGAGCA-3'                                                                                                                                                                                                            |
| oligonucleotides of the human<br>Keap1 sgRNA target<br>sequences_Reverse | 5'-AAACTGCTCCCGAAGCCCGTTGGT-3'                                                                                                                                                                                                            |
| mouse Keap1(Common)_Forward                                              | 5'-CAGCTACACACTAGAGGATC-3'                                                                                                                                                                                                                |
| mouse Keap1(WT)_Reverse                                                  | 5'-CCATGCCCTGCTCCCGAAGC-3'                                                                                                                                                                                                                |
| mouse<br>Keap1(W→A mutant)_Reverse                                       | 5'-CACGCTGGCGTGGCACTCCTTG-3'                                                                                                                                                                                                              |

---

**Table S3 List of NCBI Gene accession used in this study**

|                                       | <b>NCBI Gene accession</b> |
|---------------------------------------|----------------------------|
| <i>H. sapiens</i> Keap1 sequence      | 9817                       |
| <i>M. musculus</i> Keap1 sequence     | 50868                      |
| <i>M. gallopavo</i> Keap1 sequence    | 104917088                  |
| <i>C. picta bellii</i> Keap1 sequence | 101953638                  |
| <i>X. tropicalis</i> Keap1B sequence  | 493386                     |
| <i>O. latipes</i> Keap1B sequence     | 101160787                  |
| <i>D. rerio</i> Keap1B sequence       | 100003679                  |
| <i>C. carpio</i> Keap1B sequence      | 109053857                  |
| <i>X. tropicalis</i> Keap1A sequence  | 100489128                  |
| <i>O. latipes</i> Keap1A sequence     | 101159396                  |
| <i>D. rerio</i> Keap1A sequence       | 321837                     |
| <i>C. carpio</i> Keap1A sequence      | 109054162                  |
| <i>C. intestinalis</i> Keap1 sequence | 100177101                  |
| <i>S. purpuratus</i> Keap1 sequence   | 100889922                  |
| <i>O. bimaculoides</i> Keap1 sequence | 106877646                  |
| <i>A. californica</i> Keap1 sequence  | 101863786                  |
